# Supplementary material
Source: Springer Nature journal article supplement (https://www.springermedizin.de/resource/supplementary/13054_2011_9649_MOESM4_ESM.pdf/9706854)

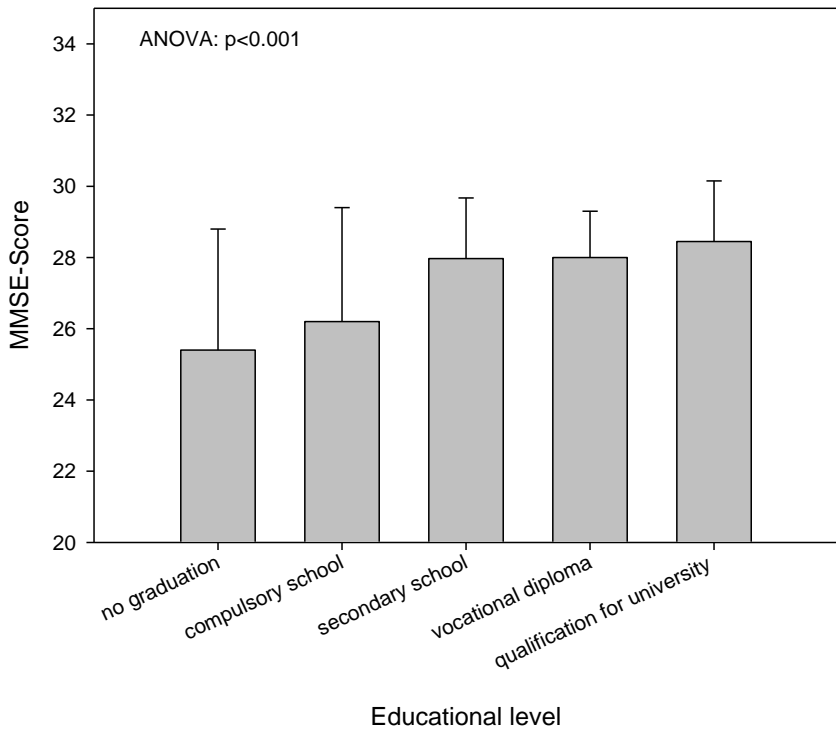

Supplement: MOESM4 [file 9706854]
